# Supplementary figures and images for: Valproic Acid Reduces Vasospasm through Modulation of Akt Phosphorylation and Attenuates Neuronal Apoptosis in Subarachnoid Hemorrhage Rats
Source: MDPI journal article supplement (doi:10.3390/ijms22115975), 2021-06-01

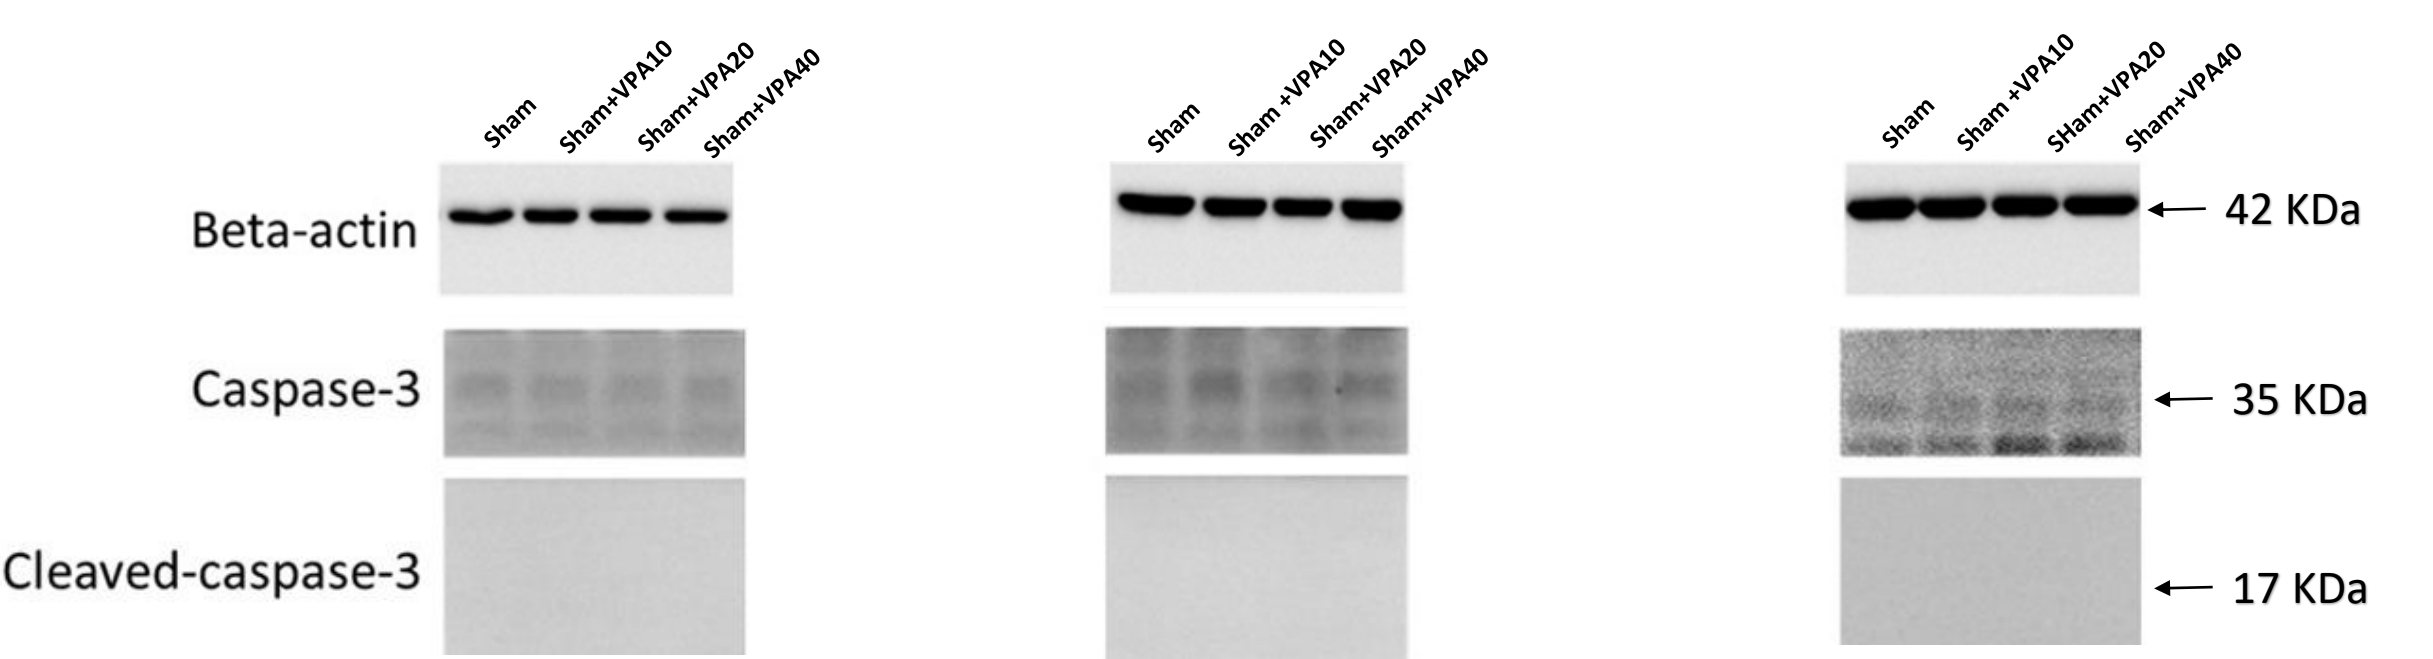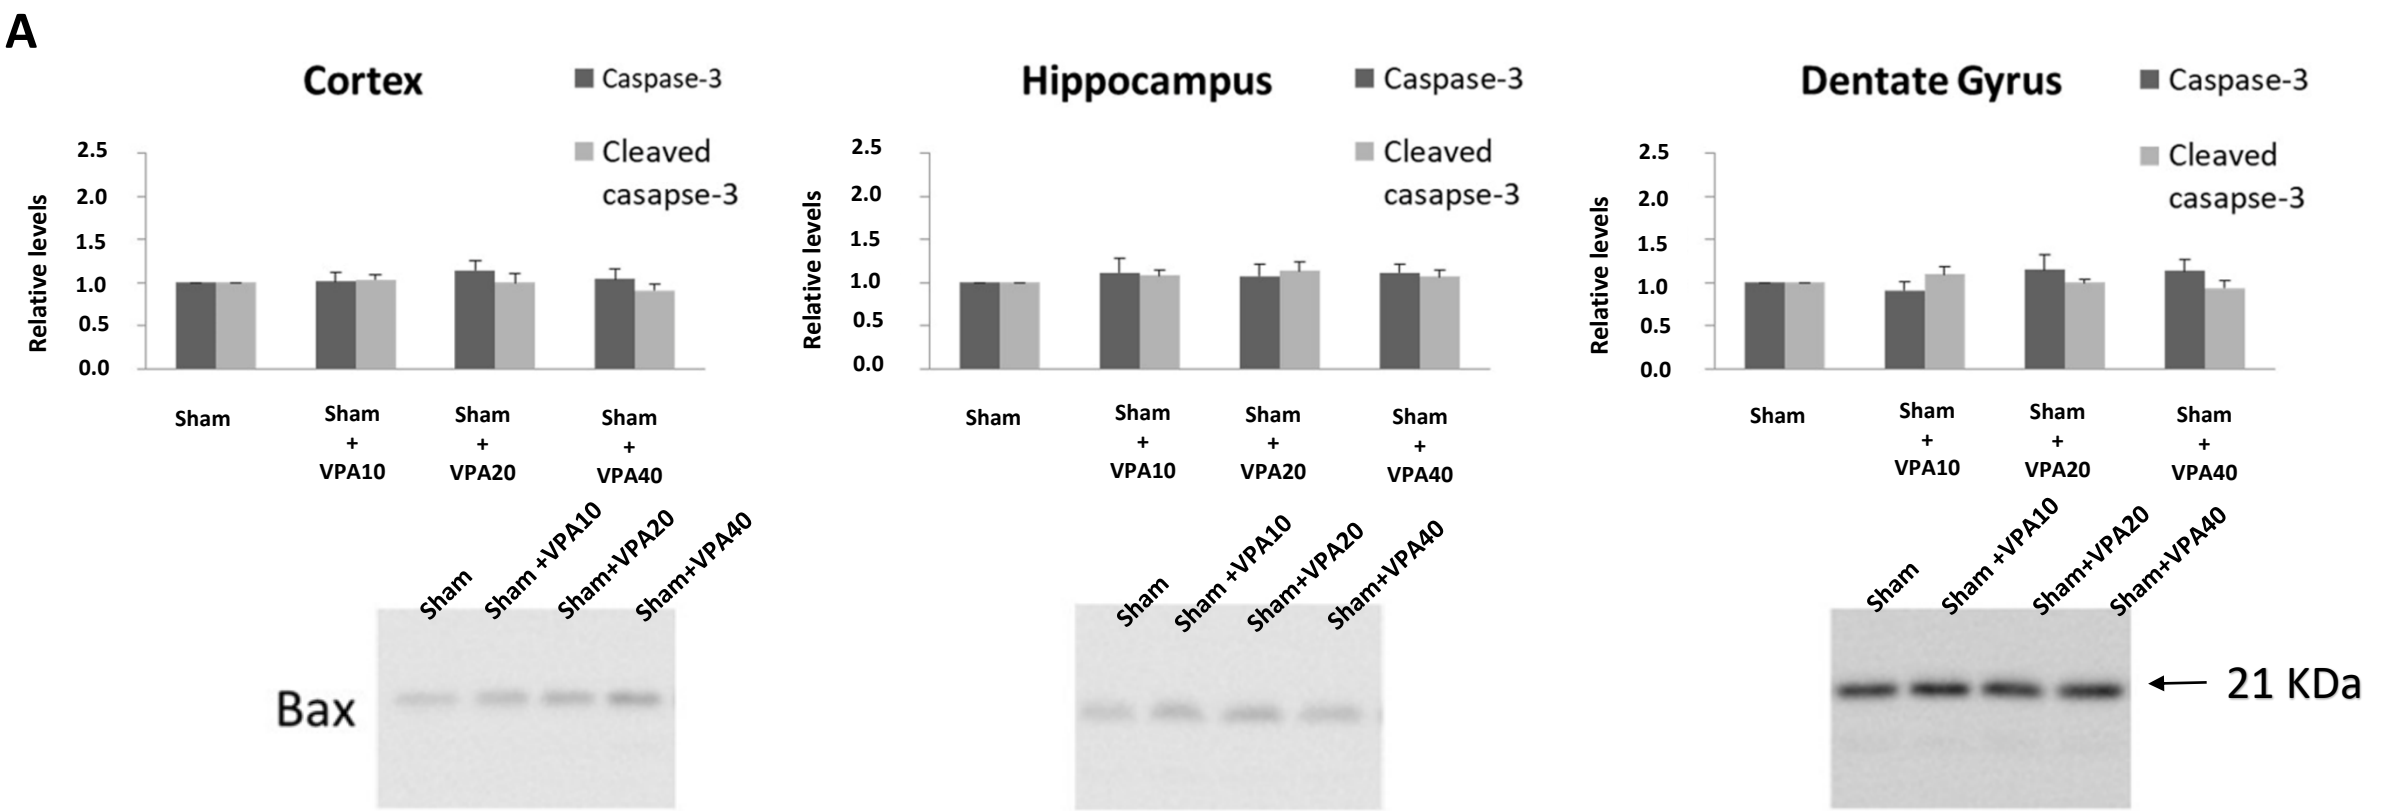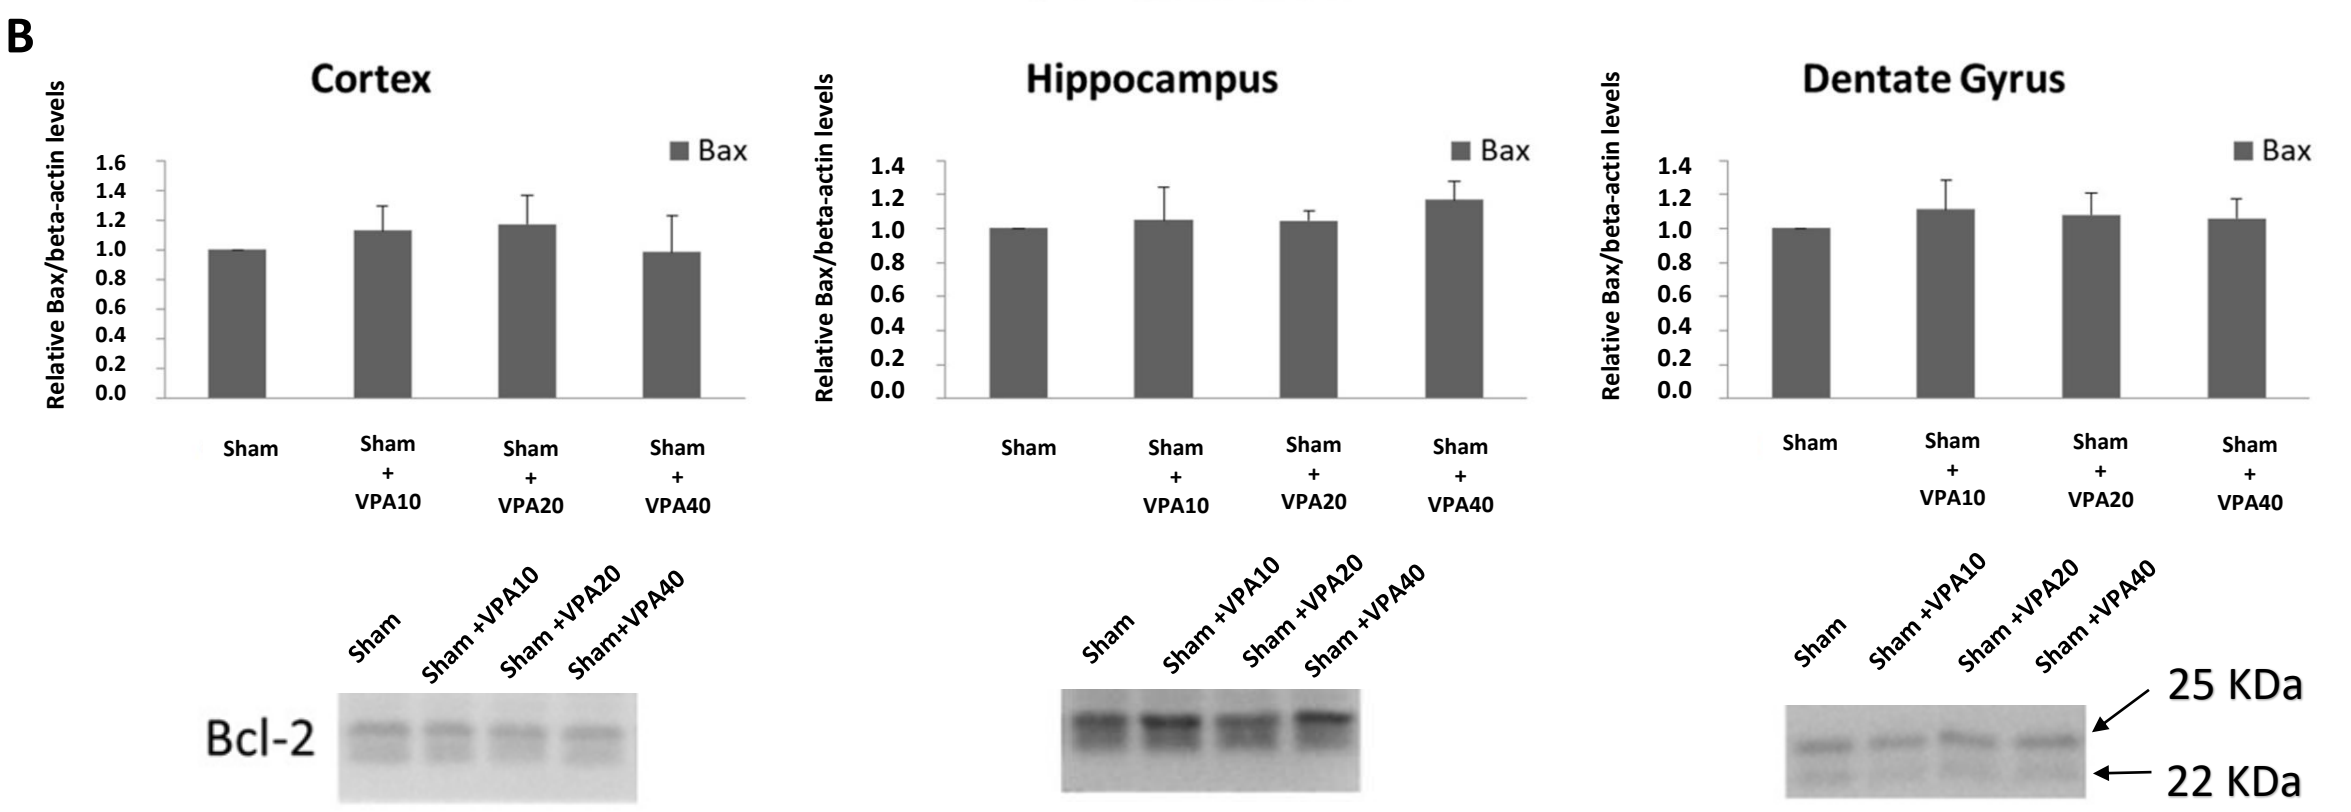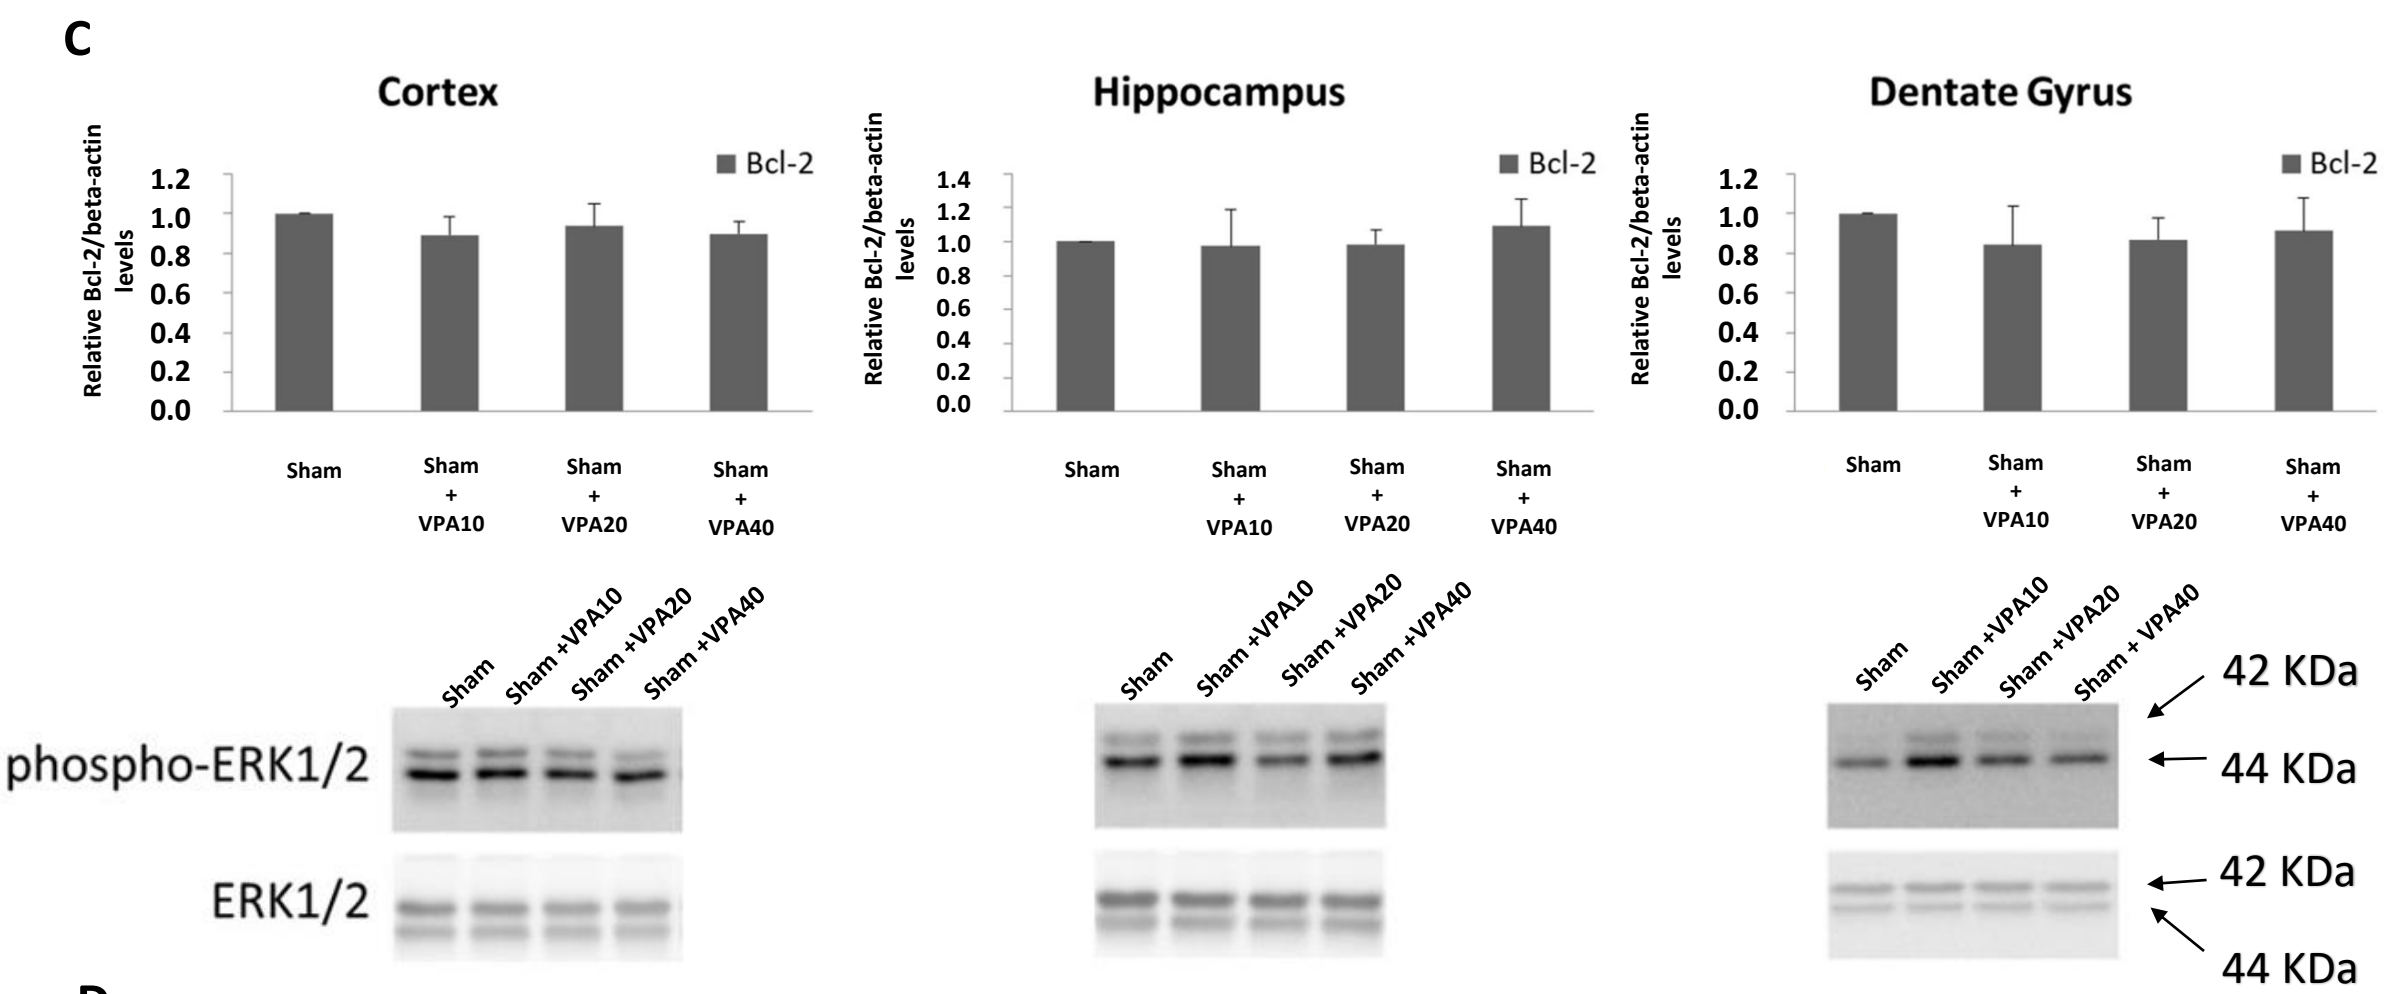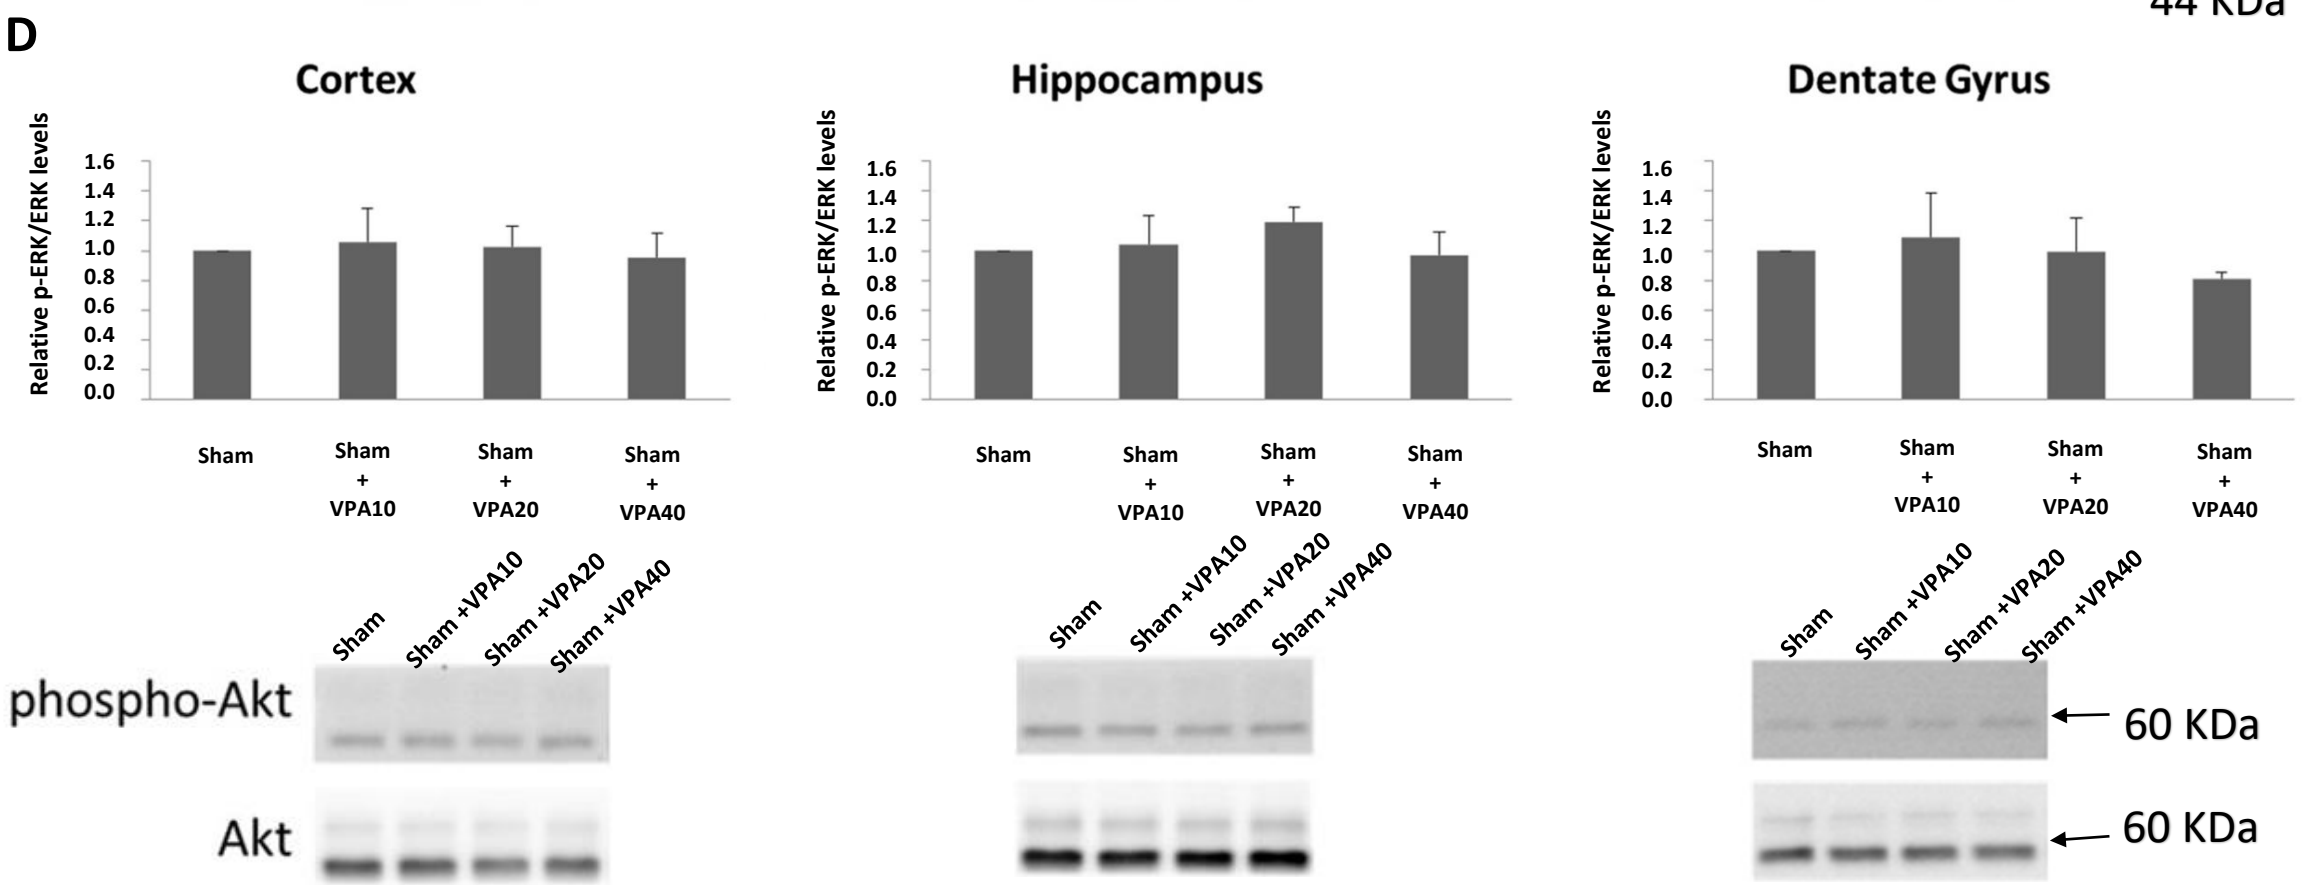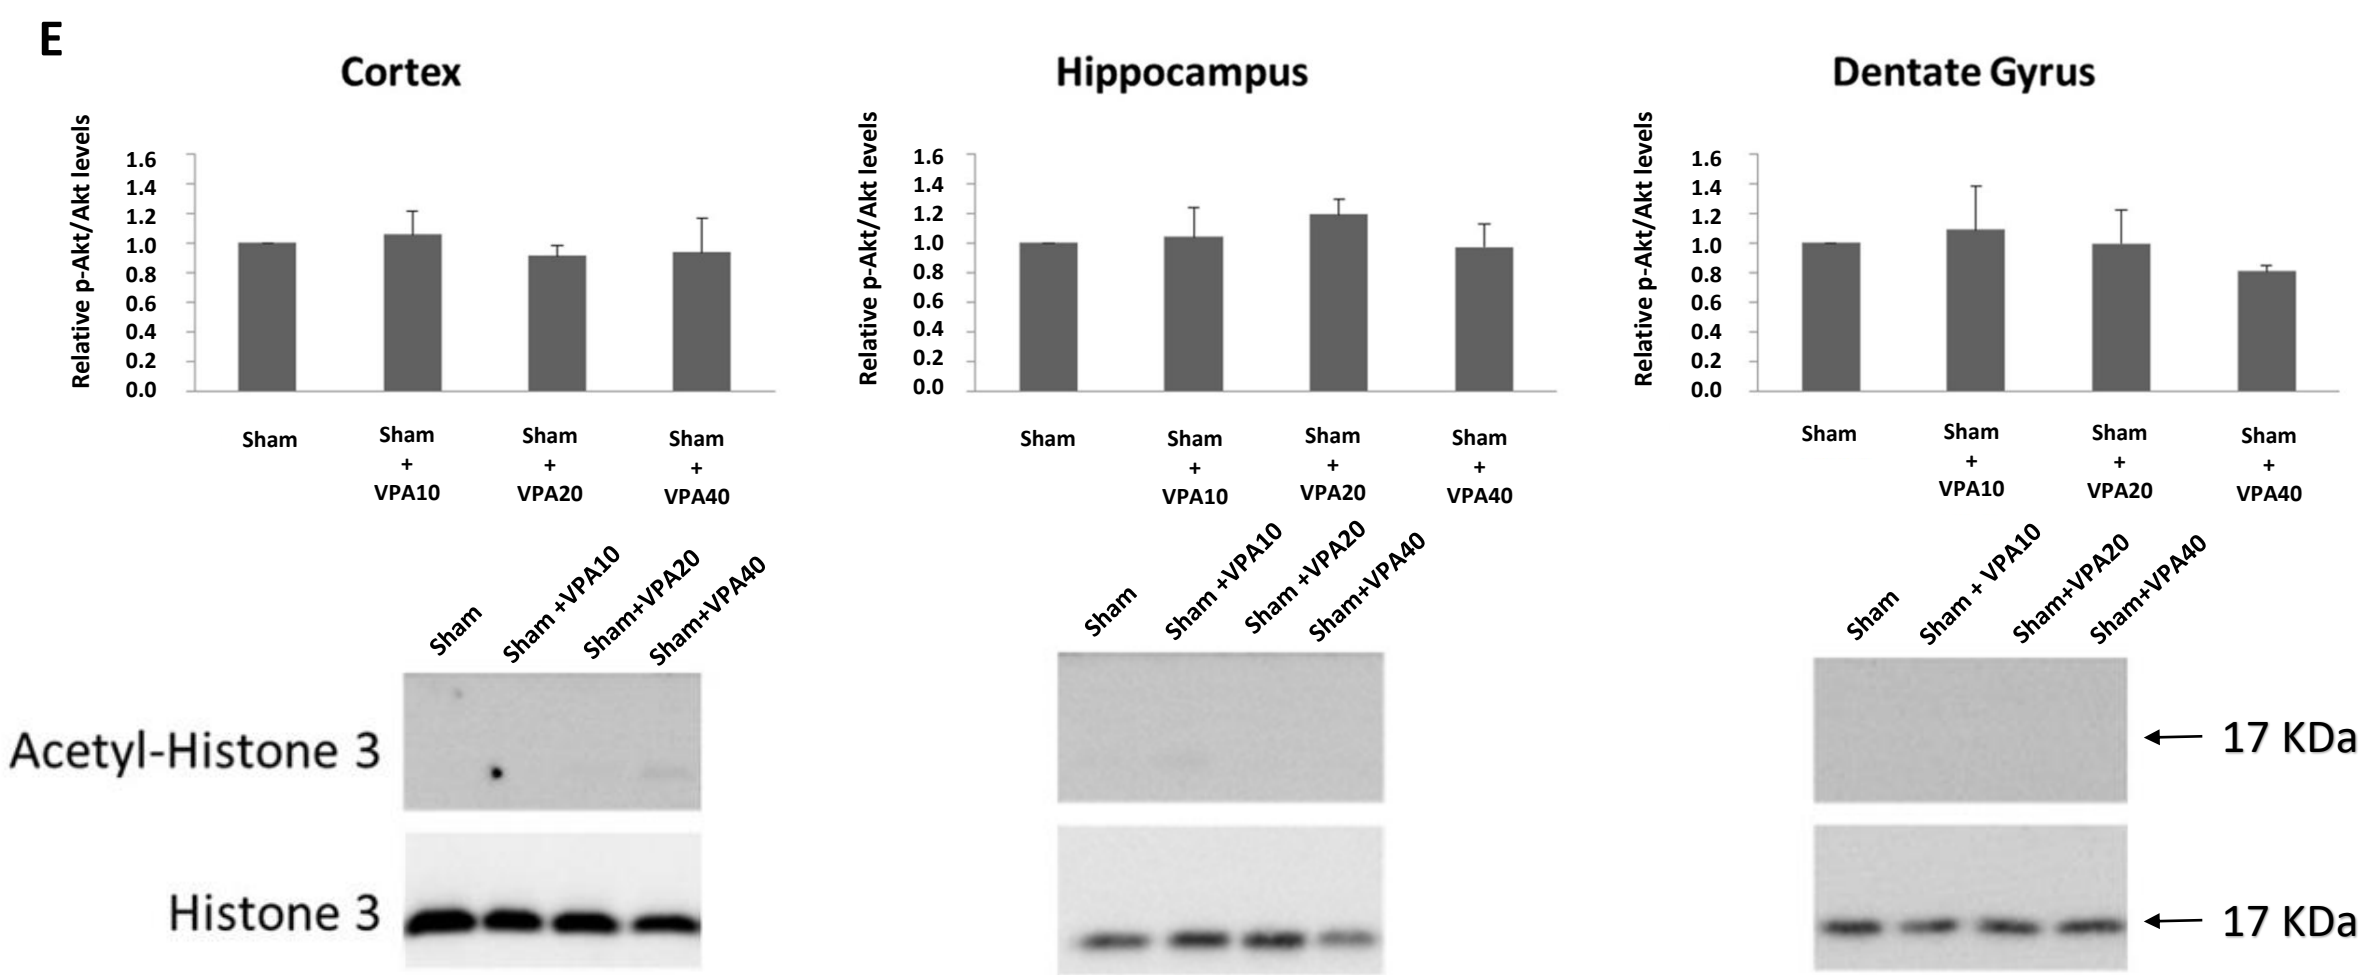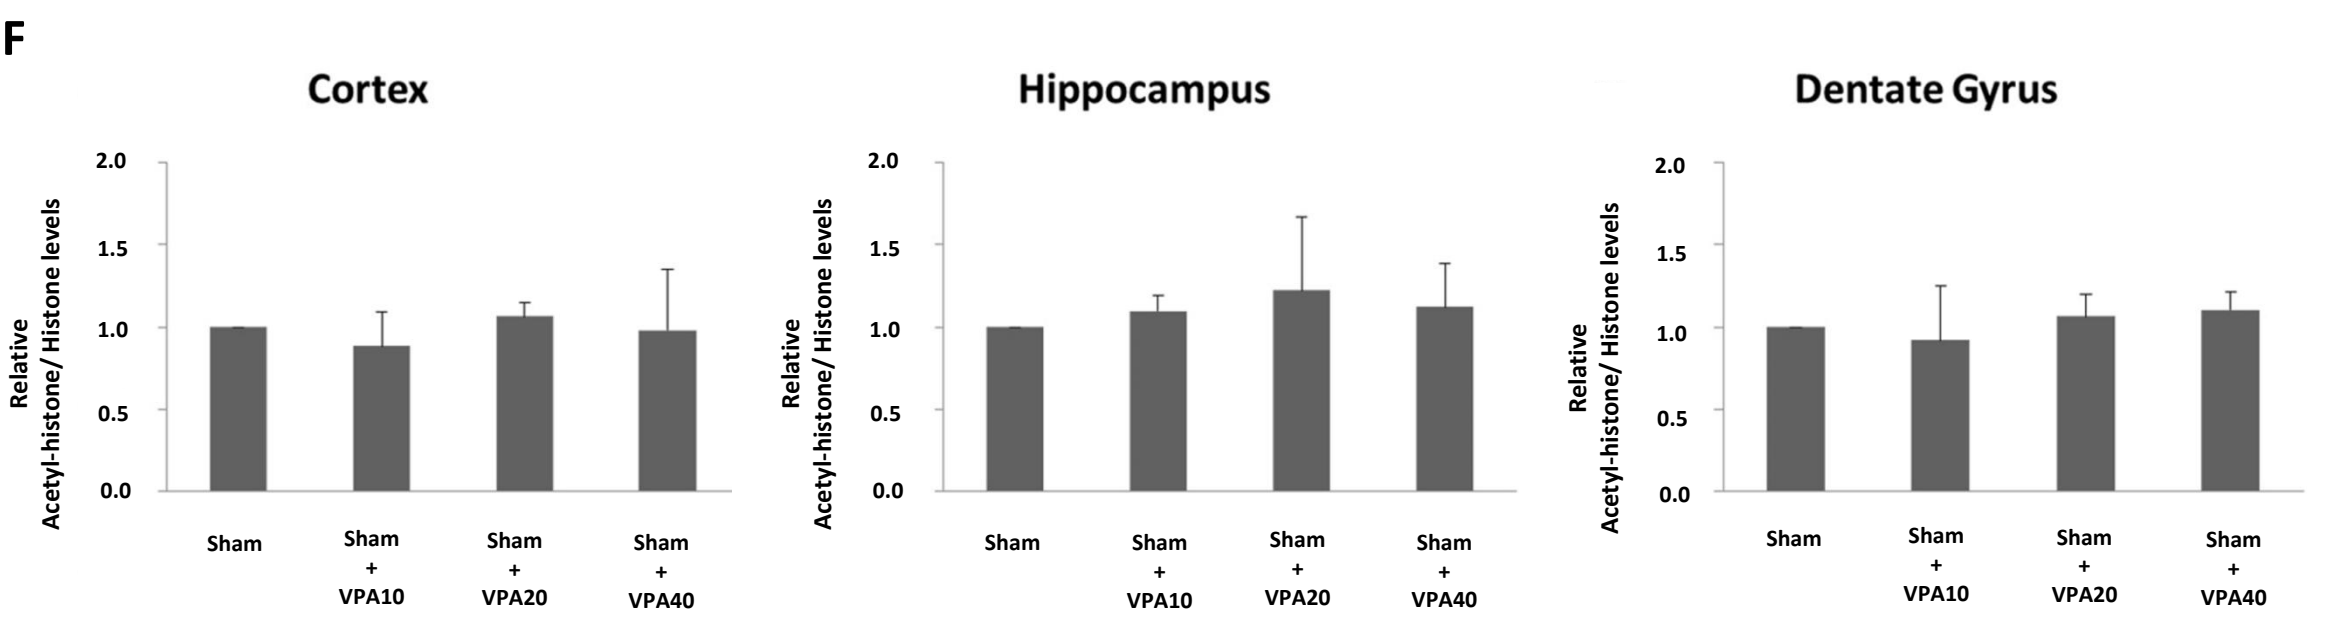

Supplement: s1 [file s1]
